# Supplementary material
Source: publisher site journal article supplement (https://www.dovepress.com/article/420312)
Supplement: Supplementary file 1 [file get_supplementary_file.php]

Supplementary

Figure S1

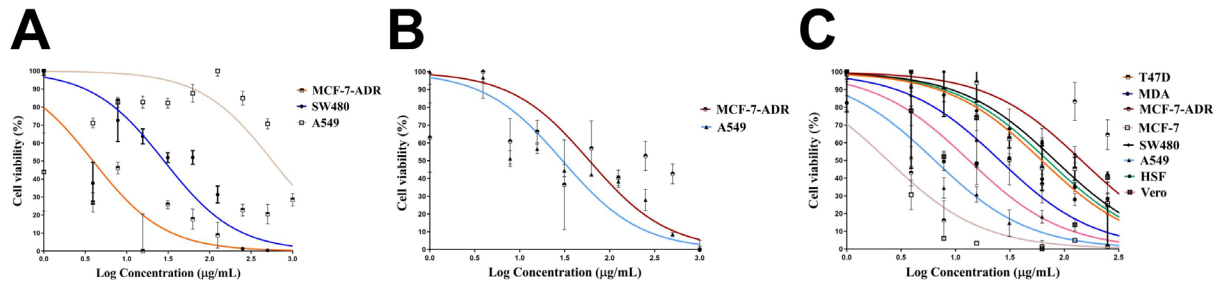

Sigmoidal curve of cell viability percentage of Ch@AgNPs (A), 5-FU (B), and Doxo (C) against T47D, MDA-MB231, MCF-7, MCF-7ADR, Sw480, A549, HFs, and Vero cells.
